# Supplementary material for: Involvement of the MxtR/ErdR (CrbS/CrbR) Two-Component System in Acetate Metabolism in Pseudomonas putida KT2440
Source: MDPI journal article supplement (doi:10.3390/microorganisms9081558), 2021-07-22
Supplement: s1 [file s1]

# **Involvement of the MxtR/ErdR (CrbS/CrbR) two-component system in acetate metabolism in *Pseudomonas putida* KT2440**

**Tania Henriquez<sup>1, \*</sup> and Heinrich Jung<sup>1</sup>**

<sup>1</sup> Biozentrum, Ludwig-Maximilians-Universität München, Martinsried, Germany

\* Correspondence: T.Henriquez@bio.lmu.de

Table S1. List of primers used in this study.

| Name             | Sequence (5'-3')            | Description                 |
|------------------|-----------------------------|-----------------------------|
| del1635 A_S      | CCACCAGCGTTTGCATA           | Deletion pp_1635            |
| del1635 A_A1     | TTGTTGCCAATGCTTGCGACTT      | Deletion pp_1635            |
| del1635 B_S1     | AAGCATTGGCAACAACCTGAATC     | Deletion pp_1635            |
| del1635 B_A      | AAACGCGCATCATGATT           | Deletion pp_1635            |
| check 1635 F     | GATCATTTCTGTACGGCA          | Checking deletion pp_1635   |
| check 1635 F     | AGCGAAATGCGATCGATGG         | Checking deletion pp_1635   |
| Clone1635 seva F | ACAGaATtCTTAGATCGATGGCCACAT | Cloning pp_1635             |
| CloneH 1635 R    | AAGCcTcgAGCCACACGCAGT       | Cloning pp_1635             |
| pp_4487 F        | cgtatcgactggatcaagc         | qRT-PCR                     |
| pp_4487 R        | CAGTTGGAGGAAACGTTCA         | qRT-PCR                     |
| actP F           | CCAAACGCAACAAGTCGG          | qRT-PCR                     |
| actP R           | GGAAATACCCAGGAACGAG         | qRT-PCR                     |
| pp_0154 F        | CCTGACCATGTACTCCGAAG        | qRT-PCR                     |
| pp_0154 R        | CGAACACATCGGCATTGC          | qRT-PCR                     |
| pp_0317 F        | CCAACGCGATACCTCGAT          | qRT-PCR                     |
| pp_0317 R        | GGTCGAATGCTGCCTGTTT         | qRT-PCR                     |
| acs F            | ATCCTGGTCAACATCAACC         | qRT-PCR                     |
| acs R            | AATCGGACGTCTTGAATGC         | qRT-PCR                     |
| acsA-II F        | TGAAACAGAACGTCGACAA         | qRT-PCR                     |
| acsA-II R        | CATCCTTCGTCGCTTCGTG         | qRT-PCR                     |
| actpII F         | GATGGCTACATCTACCTC          | qRT-PCR                     |
| actpII R         | ATACGAGGTGATATCGGCAA        | qRT-PCR                     |
| actP-III qPCR F  | CAGTGATGCCAAGGAAGC          | qRT-PCR                     |
| actP-III qPCR R  | TGCCGACCATGACGATG           | qRT-PCR                     |
| Clone mxtR F2    | TTTGaaTtcGAGTCTTCATGTCGTTGT | Cloning pp_1695             |
| Clone mxtR A     | TGCCCAGGTTAGCGGTTACT        | Cloning pp_1695             |
| Del1695_As_BamHI | GGTGGTGGTGGATCCCAAGGTCAG    | Deletion pp_1695            |
| Del1695_Aas_OL   | CTTCTATGGGGACTACCTGGCCAAAC  | Deletion pp_1695            |
| Del1695_Bs_OL    | GGTAGTCCCCATAGAAGGCGATGGCG  | Deletion pp_1695            |
| Del1695_Bas_NheI | AGTTCACCGGCTAGCTGTCCCAGTACC | Deletion pp_1695            |
| Del1695_check_s  | AAGGGCCGCGAATACCAGAC        | Checking deletion pp_1695   |
| Del1695_check_as | ATCGTCGGCTGGTGTGCTTTAC      | Checking deletion pp_1695   |
| sodBF EMSA       | AACACCTATGTCGTGAACCT        | EMSA                        |
| sodBR EMSA       | TTCCAGTAGAAGGTGTGGTT        | EMSA                        |
| ScpcF EMSA       | TCTGCCGGGGCTTTTCTTT         | EMSA                        |
| Pscpc R          | GGACTCGAGTCTCGGGCTACTGA     | EMSA                        |
| 0354R EMSA       | TCATAGACTTACGTCCAAT         | EMSA                        |
| Ppp_0354 F       | TAGGCGTCCTTTTGCTCAT         | EMSA                        |
| acsAIF EMSA      | AATCGCCTTGCCGTTGCT          | EMSA                        |
| acsAIR EMSA      | TTACAGCCTTGCCGACGAAA        | EMSA                        |
| acsA-I F EMSA2   | TTACCTGTCTAAGGTCGTG         | EMSA                        |
| acsA-I R EMSA2   | AGCAACGGCAAGGCGATTA         | EMSA                        |
| actPIF EMSA      | CGCGAACGGGTCATCACTT         | EMSA                        |
| actPIR EMSA      | TGTTTTTGTCTAGCAGCA          | EMSA                        |
| cloneH 1635F     | AGACATATGGCCACATACGAAATCCTG | Cloning pp_1635 into pET16b |
| cloneH 1635R     | AAGCCTCGAGCCACACGCAGT       | Cloning pp_1635 into pET16b |

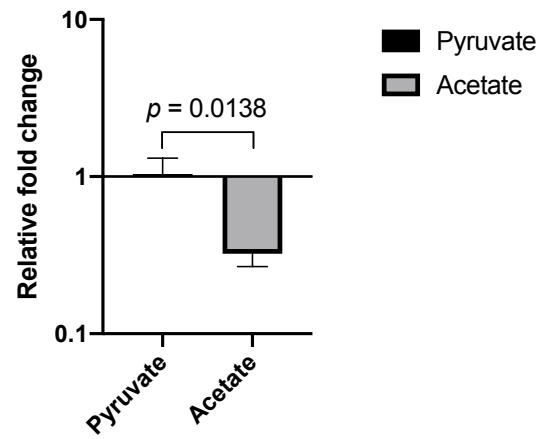

**Figure S1.** Analysis of the relative expression of *actP-I*. Gene expression was analyzed by qRT-PCR in *P. putida* KT2440 wild type strain grown in minimal medium with acetate compared to growth in pyruvate as sole carbon source. The experiments were performed a minimum of three times.

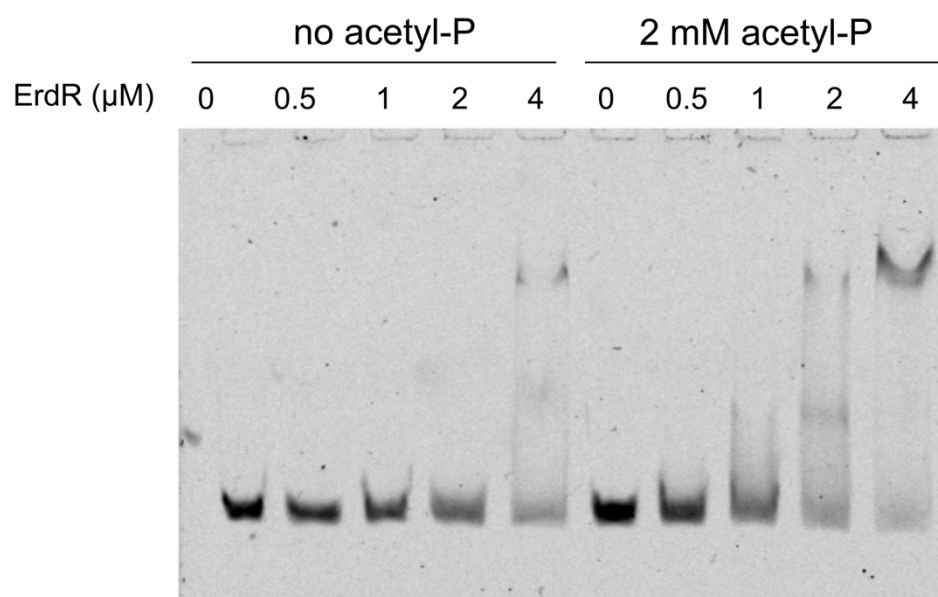

**Figure S2.** Comparison of binding of purified ErdR to promoter region of pp\_0354 in absence and presence of acetyl-phosphate. The EMSA was performed using different concentrations of ErdR (0, 0.5, 1, 2 and 4  $\mu$ M), 2.5 ng of the amplified promoter and 2 mM acetyl-phosphate (when needed).
